# Supplementary material
Source: MDPI journal article supplement (https://www.mdpi.com/2076-0760/10/7/271)
Supplement: s1 [file s1]

**Table S1.** Periodic expenditure and publication during the days leading up to the elections. Source: Own elaboration.

| Days before<br>the Election<br>Day | Elections | Ciudadanos    |                       | Izquierda Unida  |                       | Partido Popular  |                       | Podemos          |                       | PSOE             |                       | VOX España       |                       | Total<br>number<br>of ads | Total<br>estimated<br>cost (€) |
|------------------------------------|-----------|---------------|-----------------------|------------------|-----------------------|------------------|-----------------------|------------------|-----------------------|------------------|-----------------------|------------------|-----------------------|---------------------------|--------------------------------|
|                                    |           | Number<br>Ads | Estimated<br>Cost (€) | Number<br>of Ads | Estimated<br>Cost (€) |                           |                                |
| 1                                  | 28A       |               |                       |                  |                       |                  |                       |                  |                       |                  |                       |                  |                       |                           |                                |
|                                    | 10N       |               |                       |                  |                       |                  |                       |                  |                       |                  |                       |                  |                       |                           |                                |
| 2                                  | 28A       |               |                       |                  |                       | 4                | 11,100                |                  |                       | 25               | 1,500                 |                  |                       | 29                        | 12,600                         |
|                                    | 10N       |               | 29                    | 1,450            |                       |                  |                       |                  |                       |                  |                       |                  |                       | 29                        | 1,450                          |
| 3                                  | 28A       |               | 1,692                 | 126,100          | 1                     | 750              | 400                   | 200,700          | 1                     | 3,000            | 16                    | 2,250            |                       | 2,110                     | 332,800                        |
|                                    | 10N       |               | 1                     | 50               | 4                     | 200              | 1                     | 50               | 101                   | 8,550            |                       | 33               | 2,250                 | 140                       | 11,100                         |
| 4                                  | 28A       |               | 389                   | 24,350           | 1                     | 750              | 866                   | 62,650           | 14                    | 13,850           | 24                    | 3,200            |                       | 1,294                     | 104,800                        |
|                                    | 10N       |               | 45                    | 2,450            | 1                     | 50               |                       |                  |                       |                  |                       |                  |                       | 46                        | 2,500                          |
| 5                                  | 28A       |               | 594                   | 38,350           | 4                     | 1,650            | 730                   | 57,450           | 115                   | 213,200          | 81                    | 10,300           |                       | 1,524                     | 320,950                        |
|                                    | 10N       |               | 317                   | 16,850           |                       |                  |                       |                  | 34                    | 7,700            | 15                    | 1,150            |                       | 366                       | 25,700                         |
| 6                                  | 28A       |               | 331                   | 24,950           | 5                     | 1,000            | 110                   | 23,000           | 65                    | 96,450           | 71                    | 8,450            |                       | 582                       | 153,850                        |
|                                    | 10N       |               | 420                   | 22,600           |                       |                  |                       |                  | 171                   | 89,900           | 1                     | 50               |                       | 592                       | 112,550                        |
| 7                                  | 28A       |               | 406                   | 21,750           |                       |                  | 2                     | 600              | 13                    | 12,400           | 88                    | 8,500            |                       | 509                       | 43,250                         |
|                                    | 10N       |               | 508                   | 28,000           |                       |                  | 6                     | 1,300            | 35                    | 16,550           | 19                    | 1,050            |                       | 568                       | 46,900                         |
| 8                                  | 28A       |               | 543                   | 31,300           | 1                     | 50               | 1                     | 750              | 30                    | 35,400           |                       |                  |                       | 575                       | 67,500                         |

|    |     |     |        |   |     |     |        |    |        |     |        |  |  |       |         |
|----|-----|-----|--------|---|-----|-----|--------|----|--------|-----|--------|--|--|-------|---------|
|    | 10N | 962 | 54,700 |   |     | 285 | 14,250 | 13 | 2,550  | 26  | 1,700  |  |  | 1,286 | 73,200  |
| 9  | 28A | 401 | 20,800 |   |     | 134 | 6,700  | 25 | 79,850 |     |        |  |  | 560   | 107,350 |
|    | 10N | 46  | 3,000  |   |     | 604 | 30,300 | 20 | 1,600  | 39  | 2,350  |  |  | 709   | 37,250  |
| 10 | 28A | 512 | 50,050 |   |     | 113 | 5,650  | 42 | 94,550 | 17  | 15,900 |  |  | 684   | 166,150 |
|    | 10N | 134 | 6,700  |   |     | 12  | 600    | 46 | 5,500  | 178 | 10,900 |  |  | 370   | 23,700  |
| 11 | 28A | 431 | 35,350 |   |     | 426 | 27,200 | 25 | 52,900 |     |        |  |  | 882   | 115,450 |
|    | 10N |     |        |   |     |     |        |    |        |     |        |  |  |       |         |
| 12 | 28A | 597 | 41,450 |   |     | 78  | 5,650  | 8  | 80,250 | 14  | 1,700  |  |  | 697   | 129,050 |
|    | 10N |     |        |   |     |     |        | 1  | 3,750  | 7   | 350    |  |  | 8     | 4,100   |
| 13 | 28A | 202 | 33,850 |   |     | 464 | 26,400 | 3  | 3,350  |     |        |  |  | 669   | 63,600  |
|    | 10N |     |        |   |     |     |        |    |        |     |        |  |  | 0     | 0       |
| 14 | 28A |     |        |   |     | 139 | 7,200  |    |        |     |        |  |  | 139   | 7,200   |
|    | 10N |     |        |   |     |     |        |    |        |     |        |  |  | 0     | 0       |
| 15 | 28A |     |        |   |     | 141 | 7,050  | 5  | 1,500  |     |        |  |  | 146   | 8,550   |
|    | 10N |     |        |   |     |     |        |    |        |     |        |  |  | 0     | 0       |
| 16 | 28A |     |        | 1 | 300 | 1   | 750    | 1  | 3,000  |     |        |  |  | 3     | 4,050   |
|    | 10N |     |        |   |     |     |        |    |        |     |        |  |  | 0     | 0       |
| 17 | 28A |     |        |   |     |     |        | 4  | 2,550  |     |        |  |  | 4     | 2,550   |

[illegible]

|       |     |       |         |    |       |       |         |     |         |     |        |    |       |        |           |
|-------|-----|-------|---------|----|-------|-------|---------|-----|---------|-----|--------|----|-------|--------|-----------|
|       | 10N |       |         |    |       |       |         |     |         |     |        |    |       |        |           |
| 27    | 28A |       |         |    |       |       |         |     |         |     |        |    |       |        |           |
|       | 10N |       |         |    |       |       |         |     |         |     |        | 1  | 50    | 1      | 50        |
| 28    | 28A |       |         |    |       |       |         |     |         |     |        |    |       |        |           |
|       | 10N |       |         |    |       |       |         |     |         |     |        | 2  | 100   | 2      | 100       |
| 29    | 28A |       |         |    |       |       |         |     |         |     |        |    |       |        |           |
|       | 10N |       |         |    |       |       |         |     |         |     |        | 2  | 100   | 2      | 100       |
| 30    | 28A |       |         |    |       |       |         |     |         |     |        |    |       |        |           |
|       | 10N |       |         |    |       |       |         | 12  | 4,050   |     |        | 2  | 100   | 14     | 4,150     |
| 31    | 28A |       |         |    |       |       |         |     |         |     |        |    |       |        |           |
|       | 10N |       |         |    |       |       |         | 8   | 400     |     |        |    |       | 8      | 400       |
| 32    | 28A |       |         |    |       |       |         | 1   | 3,000   |     |        |    |       | 1      | 3,000     |
|       | 10N |       |         |    |       |       |         | 6   | 300     |     |        |    |       | 6      | 300       |
| 33    | 28A |       |         |    |       |       |         |     |         |     |        |    |       |        |           |
|       | 10N |       |         |    |       |       |         | 1   | 50      |     |        |    |       | 1      | 50        |
| 34    | 28A |       |         |    |       |       |         |     |         |     |        |    |       |        |           |
|       | 10N |       |         |    |       |       |         | 4   | 200     |     |        |    |       | 4      | 200       |
| TOTAL |     | 8,560 | 584,100 | 18 | 4,750 | 4,517 | 489,350 | 924 | 995,100 | 621 | 69,350 | 44 | 2,800 | 14,684 | 2,145,450 |

Notes: 28A: April 28, 2019, General elections; 10N: November 10, 2019, General elections.
